# Supplementary material for: A hybrid design of Ag-decorated ZnO on layered nanomaterials (MgAC) with photocatalytic and antibacterial dual-functional abilities
Source: Royal Society of Chemistry journal article supplement (doi:10.1039/d1ra08365a), 2021-01-01
Supplement: d1ra08365a1.pdf [file d1ra08365a1.pdf]

## Supporting Information

### **A hybrid design of Ag-decorated ZnO on layered nanomaterials (MgAC) with dual-function in photocatalytic and antibacterial abilities**

Tuyet Nhung Pham<sup>a\*</sup>, Nguyen Thi Hue<sup>a</sup>, Young-Chul Lee<sup>b</sup>, Tran Quang Huy<sup>a</sup>, Nguyen Thi Thu Thuy<sup>a</sup>, Hoang Van Tuan<sup>a</sup>, Nguyen Tien Khi<sup>a,c</sup>, Vu Ngoc Phan<sup>a,c</sup>, Tran Dang Thanh<sup>e</sup>,  
Vu Dinh Lam<sup>e</sup>, Anh-Tuan Le<sup>\*\*a,d</sup>

<sup>a</sup>. Phenikaa University Nano Institute (PHENA), PHENIKAA University, Hanoi 12116,  
Vietnam

<sup>b</sup>. Department of BioNano Technology, Gachon University, 1342 Seongnam-Daero, Sujeong-Gu, Seongnam-Si, Gyeonggi-do 13120, Republic of Korea

<sup>c</sup>. Faculty of Biotechnology, Chemistry and Environmental Engineering, PHENIKAA University, Hanoi 12116, Vietnam

<sup>d</sup>. Faculty of Materials Science and Engineering, PHENIKAA University, Hanoi 12116,  
Vietnam

<sup>e</sup>. Graduate University of Science and Technology (GUST) & Institute for Materials Science (IMS), Vietnam Academy of Science and Technology, 18 Hoang Quoc Viet, Hanoi 10000,  
Vietnam

Corresponding authors:

[\\*nhung.phamthituyet@phenikaa-uni.edu.vn](mailto:*nhung.phamthituyet@phenikaa-uni.edu.vn) (T.N. Pham)

[\\*\\*tuan.leanh@phenikaa-uni.edu.vn](mailto:**tuan.leanh@phenikaa-uni.edu.vn) (A-T. Le)

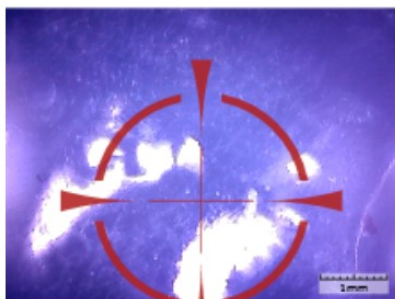

| Element | Value   | Unit | Line | Intensity | Judgment |
|---------|---------|------|------|-----------|----------|
| Cl      | 96.9085 | wt%  | Kα   | 625204.63 | ---      |
| Zn      | 1.4575  | wt%  | Kα   | 86806.26  | ---      |
| Rh      | 0.9933  | wt%  | Kα   | 47720.23  | ---      |
| Ag      | 0.3842  | wt%  | Kα   | 11720.79  | ---      |
| Fe      | 0.1133  | wt%  | Kα   | 3642.63   | ---      |
| Cu      | 0.1002  | wt%  | Kα   | 5039.71   | ---      |
| Co      | 0.0307  | wt%  | Kα   | 1182.78   | ---      |
| Ni      | 0.0124  | wt%  | Kα   | 562.79    | ---      |

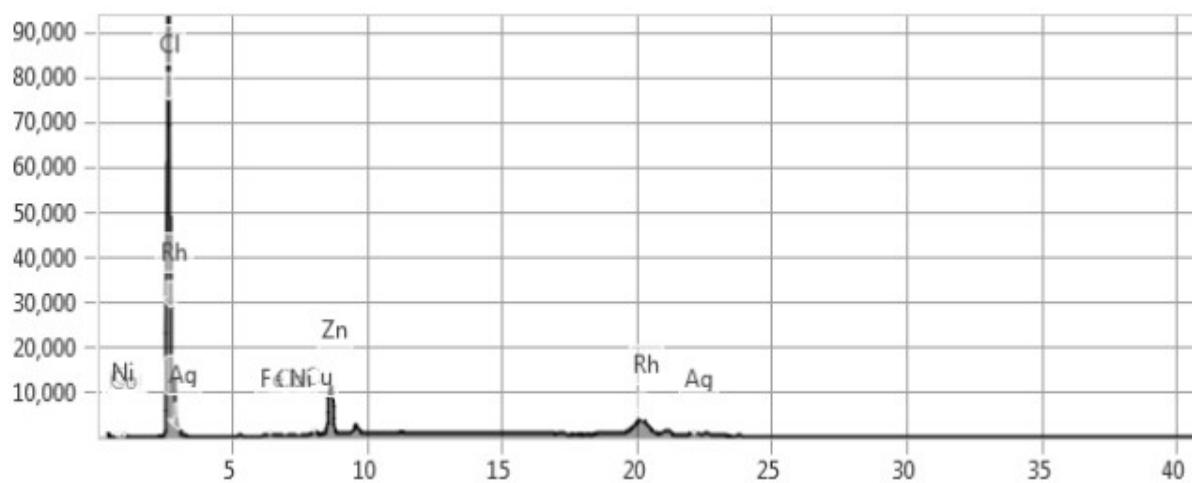

**Figure S1.** XRF analysis result for Ag@ZnO/MgAC samples

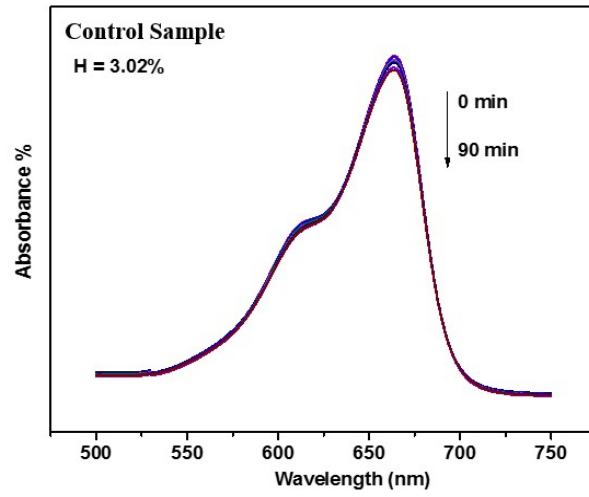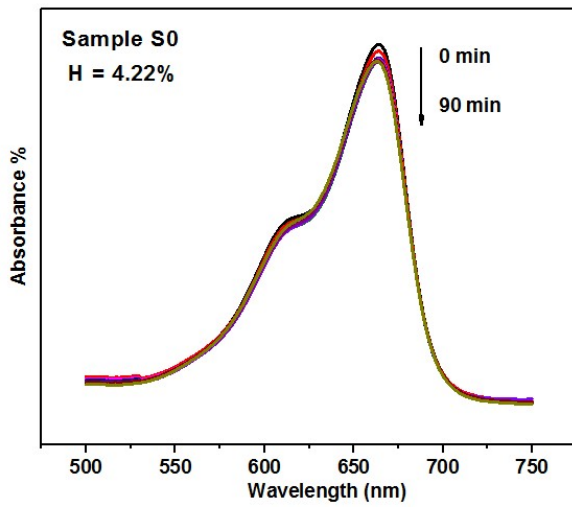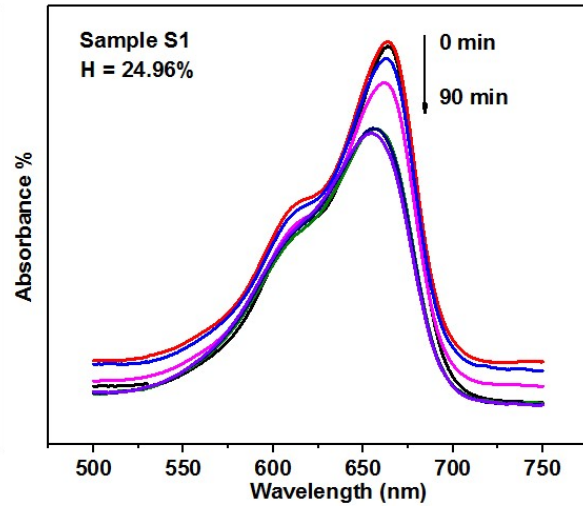

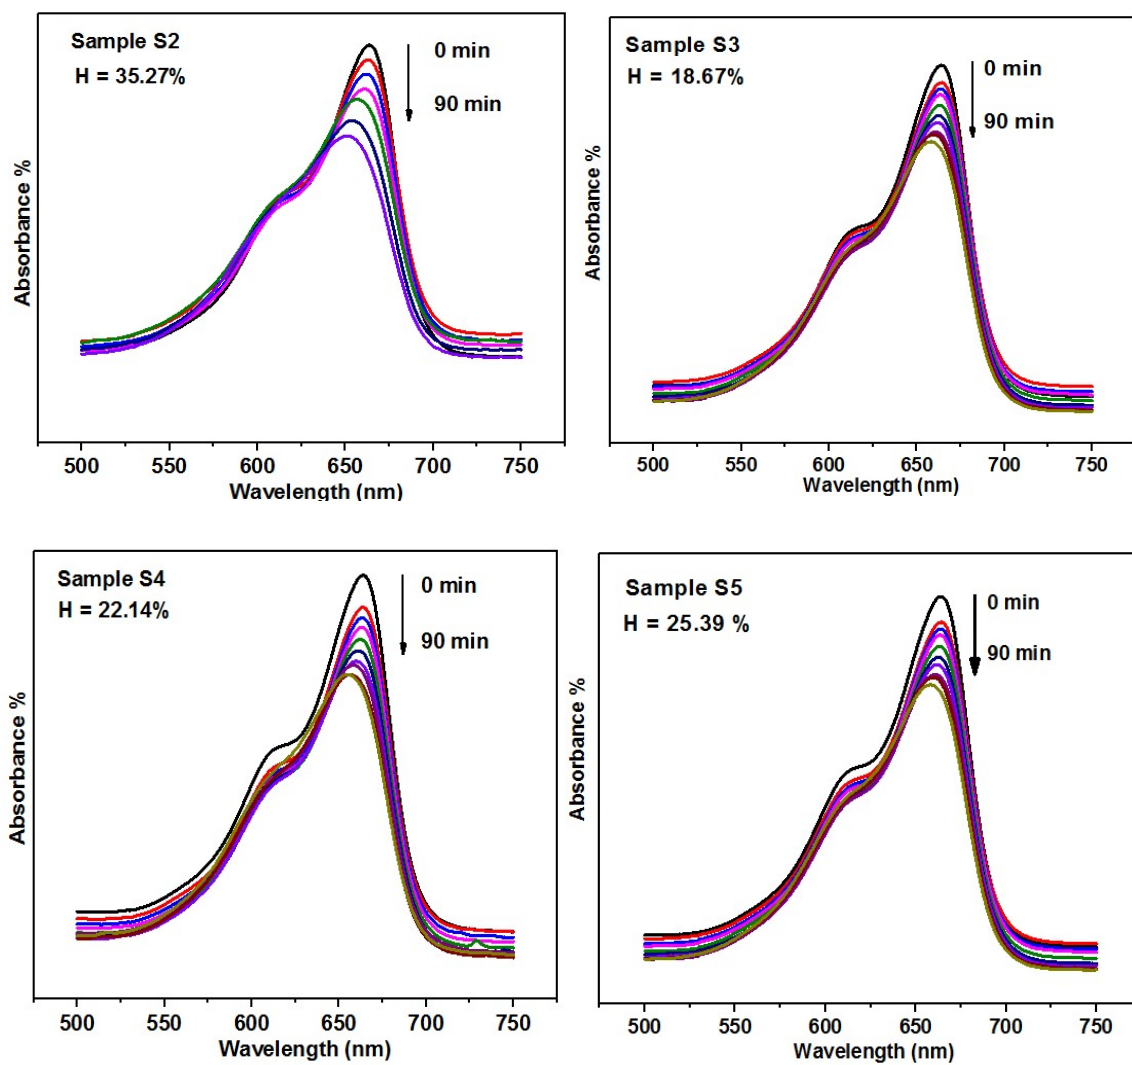

**Figure S2.** Absorption spectra of the MB solutions with different degradation time under visible light irradiation for control sample, Ag@ZnO sample (S0) and various Ag@ZnO/MgAC samples (S1-S5)
